# Supplementary material for: How wind drives the correlation between leaf shape and mechanical properties
Source: PubMed Central journal article supplement (PMC6218545; doi:10.1038/s41598-018-34588-0), 2018-11-05
Supplement: 41598_2018_34588_MOESM1_ESM.pdf [file 41598_2018_34588_MOESM1_ESM.pdf]

## **How wind drives the correlation between leaf shape and mechanical properties**

Jean-François Louf<sup>1</sup>, Logan Nelson<sup>1</sup>, Hosung Kang<sup>1,1</sup>, Pierre Ntoh Song<sup>2</sup>, Tim Zehnbaue<sup>1</sup>, and Sunghwan Jung<sup>1,3</sup>

1 Department of Biomedical Engineering and Mechanics, Virginia Tech, Blacksburg, VA 24061, USA

2 Department of Mechanical Engineering, Aix-Marseille Universite, Marseille, France

3 Department of Biological and Environmental Engineering, Cornell University, Ithaca, NY 48503, USA

## Appendix A

| Common Name            | $L_L$ (cm) | $W_c/2$ (cm) | $2L_L/W_c$ |
|------------------------|------------|--------------|------------|
| Allegheny Serviceberry | 7.02       | 0.90         | 7.77       |
| American Beech         | 8.06       | 0.87         | 9.31       |
| American Chestnut      | 13.87      | 1.18         | 11.71      |
| American Hornbeam      | 8.91       | 0.88         | 10.17      |
| American Sycamore      | 12.95      | 2.84         | 4.56       |
| Amur Maple             | 7.05       | 0.83         | 8.52       |
| Asian White Birch      | 9.48       | 1.24         | 7.64       |
| Bigleaf Magnolia       | 25.43      | 2.73         | 9.31       |
| Bigtooth Aspen         | 9.17       | 1.49         | 6.16       |
| Black Cherry           | 13.17      | 0.93         | 14.09      |
| Black Maple            | 12.35      | 2.20         | 5.62       |
| Black Oak              | 23.15      | 3.07         | 7.54       |
| Black Tupelo           | 14.86      | 1.42         | 10.46      |
| Blackthorn             | 43.16      | 3.45         | 12.52      |
| Broadleaf Hawthorn     | 7.26       | 1.32         | 5.50       |
| Callery Pear           | 6.17       | 1.36         | 4.55       |
| Canadian Serviceberry  | 5.05       | 0.73         | 6.93       |
| Carolina Silverbell    | 12.23      | 1.45         | 8.44       |
| Catawba                | 22.47      | 3.48         | 6.46       |
| Cherry Plum            | 54.60      | 5.71         | 9.56       |
| Chestnut Oak           | 13.28      | 1.40         | 9.49       |
| Chinese Elm            | 4.58       | 0.43         | 10.54      |
| Chinese Fringetree     | 7.29       | 0.93         | 7.83       |
| Chokecherry            | 5.61       | 0.71         | 7.89       |
| Common Box             | 1.97       | 0.18         | 11.06      |
| Common Persimmon       | 11.33      | 1.17         | 9.66       |
| Corkscrew Willow       | 6.16       | 0.30         | 20.38      |
| Cornelian Cherry       | 8.59       | 1.28         | 6.71       |
| Cucumbertree Magnolia  | 14.51      | 1.52         | 9.54       |
| Dotted Hawthorn        | 4.75       | 0.43         | 11.03      |
| Downy Birch            | 4.44       | 0.62         | 7.14       |
| Downy Serviceberry     | 6.61       | 0.75         | 8.87       |
| Dutch Elm              | 5.65       | 0.82         | 6.88       |
| Dwarf Hackberry        | 7.47       | 0.84         | 8.92       |
| Eastern Cottonwood     | 8.63       | 1.88         | 4.58       |
| Eastern Redbud         | 9.91       | 2.34         | 4.23       |
| English Elm            | 7.49       | 0.79         | 9.54       |
| English Oak            | 11.61      | 1.11         | 10.46      |
| European Alder         | 6.39       | 1.51         | 4.23       |
| European Beech         | 6.79       | 0.85         | 7.96       |
| European Hornbeam      | 6.54       | 0.81         | 8.12       |
| European Spindletree   | 5.76       | 0.54         | 10.68      |
| European White Birch   | 4.51       | 0.53         | 8.52       |
| Fleshy Hawthorn        | 4.43       | 0.61         | 7.32       |
| Flowering Dogwood      | 11.46      | 1.28         | 8.92       |
| Fragrant Snowbell      | 19.10      | 3.80         | 5.03       |
| Fringe-Tree            | 10.37      | 1.07         | 9.68       |
| Gray Alder             | 6.41       | 1.11         | 5.75       |

|                              |       |      |       |
|------------------------------|-------|------|-------|
| Gray Birch                   | 9.66  | 1.12 | 8.60  |
| Green Hawthorn               | 4.85  | 0.47 | 10.32 |
| Hardy Rubbertree             | 14.84 | 1.28 | 11.63 |
| Harlequin Glorybower         | 16.55 | 2.38 | 6.97  |
| Hedge Maple                  | 5.03  | 1.36 | 3.71  |
| Higan Cherry                 | 10.57 | 0.70 | 15.19 |
| Hophornbeam                  | 9.94  | 0.86 | 11.50 |
| Japanese Flowering Crabapple | 9.46  | 0.73 | 12.95 |
| Japanese Maple               | 9.53  | 1.76 | 5.40  |
| Japanese Snowbell            | 4.04  | 0.47 | 8.63  |
| Japanese Stewartia           | 7.98  | 0.87 | 9.22  |
| Japanese Tree Lilac          | 10.04 | 1.08 | 9.31  |
| Japanese Zelkova             | 6.86  | 0.64 | 10.65 |
| Katsura Tree                 | 6.33  | 1.17 | 5.40  |
| Kobus Magnolia               | 6.13  | 0.69 | 8.87  |
| Kousa Dogwood                | 10.67 | 1.03 | 10.40 |
| Lilac                        | 8.04  | 1.11 | 7.24  |
| Live Oak                     | 5.59  | 0.42 | 13.22 |
| London Plane Tree            | 11.37 | 2.18 | 5.20  |
| Northern Catalpa             | 25.20 | 3.22 | 7.82  |
| Norway Maple                 | 9.67  | 2.49 | 3.88  |
| Oneseed Hawthorn             | 3.19  | 0.46 | 6.93  |
| Oriental Cherry              | 4.30  | 1.13 | 3.80  |
| Osage Orange                 | 10.22 | 0.94 | 10.92 |
| Paper Birch                  | 5.86  | 0.90 | 6.52  |
| Paper Mulberry               | 14.03 | 2.07 | 6.78  |
| Pin Cherry                   | 4.58  | 0.42 | 10.88 |
| Pin Oak                      | 11.75 | 1.50 | 7.84  |
| Post Oak                     | 19.28 | 2.23 | 8.65  |
| Quaking Aspen                | 11.34 | 2.25 | 5.04  |
| Red Maple                    | 8.61  | 1.73 | 4.97  |
| Red Oak                      | 17.90 | 2.55 | 7.03  |
| River Birch                  | 7.50  | 1.02 | 7.32  |
| Roughleaf Dogwood            | 9.74  | 1.00 | 9.70  |
| Sargent Cherry               | 11.94 | 1.23 | 9.72  |
| Scarlet Oak                  | 17.28 | 1.83 | 9.44  |
| Scotch Elm                   | 10.71 | 1.43 | 7.51  |
| Shingle Oak                  | 10.53 | 0.66 | 16.07 |
| Shumard Red Oak              | 18.13 | 1.98 | 9.14  |
| Siberian Crabapple           | 5.93  | 0.79 | 7.48  |
| Siberian Elm                 | 6.03  | 0.69 | 8.76  |
| Silver Maple                 | 10.14 | 2.03 | 5.00  |
| Slippery Elm                 | 22.77 | 2.10 | 10.82 |
| Smooth Hawthorn              | 2.03  | 0.33 | 6.18  |
| Sourwood                     | 15.00 | 1.39 | 10.79 |
| Southern Crabapple           | 6.93  | 0.98 | 7.10  |
| Southern Magnolia            | 16.72 | 1.37 | 12.22 |
| Star Magnolia                | 9.02  | 0.81 | 11.12 |
| Striped Maple                | 15.35 | 2.78 | 5.52  |
| Sugar Maple                  | 11.60 | 2.61 | 4.44  |

|                             |       |      |       |
|-----------------------------|-------|------|-------|
| Swamp White Oak             | 10.75 | 1.04 | 10.35 |
| Sweet Birch                 | 10.18 | 1.22 | 8.33  |
| Sweetbay Magnolia           | 15.91 | 1.13 | 14.03 |
| Sycamore Maple              | 9.30  | 1.81 | 5.15  |
| Tea Crabapple               | 9.91  | 0.90 | 11.07 |
| Tuliptree                   | 17.34 | 3.24 | 5.35  |
| Umbrella Tree               | 42.38 | 4.04 | 10.48 |
| Virginia Roundleaf Birch    | 4.06  | 0.59 | 6.84  |
| Water Oak                   | 7.71  | 0.70 | 11.06 |
| Wayfaringtree               | 4.89  | 0.56 | 8.77  |
| White Mulberry              | 8.04  | 1.06 | 7.60  |
| White Willow                | 6.16  | 0.31 | 20.01 |
| Whitebarked Himalayan Birch | 6.12  | 0.97 | 6.33  |
| Yellow Birch                | 14.53 | 1.70 | 8.57  |
| Yoshino Cherry              | 6.88  | 0.91 | 7.58  |
| Yulan Magnolia              | 15.65 | 2.10 | 7.45  |
